# Supplementary material for: DNA N6-methyladenine is dynamically regulated in the mouse brain following environmental stress
Source: PubMed Central journal article supplement (PMC5654764; doi:10.1038/s41467-017-01195-y), 2017-10-24
Supplement: 41467_2017_1195_MOESM3_ESM.pdf [file 41467_2017_1195_MOESM3_ESM.pdf]

**File Name:** Supplementary Data 1

**Description:** Significant loss-of-6mA regions upon stress.

**File Name:** Supplementary Data 2

**Description:** Significant gain-of-6mA regions upon stress.

**File Name:** Supplementary Data 3

**Description:** Stress-induced transposon expression.

**File Name:** Supplementary Data 4

**Description:** Stress-induced gene expression alterations determined by RNA-seq.

**File Name:** Supplementary Data 5

**Description:** Upregulated genes bearing significant loss-of-6mA are strongly associated with biological pathways.
